# Supplementary material
Source: PubMed Central journal article supplement (PMC4498086)
Supplement: supp_M114.635433_jbc.M114.635433-1.pdf [file supp_M114.635433_jbc.M114.635433-1.pdf]

Supplemental Table 1. Primers used for the construction of expression vectors.

| Name                | Direction | Sequence (Restriction site and tag sequence contained)                                                                          |
|---------------------|-----------|---------------------------------------------------------------------------------------------------------------------------------|
| Pex3p-HA            | forward   | 5'-CGCGGTACCCACCATGCTGAGGTCTGTATGGAATTTTCTG-3' ( <i>Acc65I</i> site)                                                            |
|                     | reverse   | 5'-CGCGCGGCCGCTCAAGCGTAATCTGGAACATCGTATGGGTATTTCTCCAGTTGCTGAGGGGTACT-3' ( <i>NotI</i> site, in-frame HA sequence)               |
| Pex16p-V5           | forward   | 5'-CGCGGTACCCACCATGGAGAAGCTGCGGCTCCTGGGCCTC-3' ( <i>Acc65I</i> site)                                                            |
|                     | reverse   | 5'-CGCGCGGCCGCTCACGTAGAATCGAGACCGAGGAGAGGGTTAGGGATAGGCTTACCGCCCAACTGTAGAAGTAGATTTT-3' ( <i>NotI</i> site, in-frame V5 sequence) |
| Myc-Pex19p          | forward   | 5'-CGCGGATCCCCACCATGGAACAAAACTCATCTCAGAAGAGGATCTGGCCGCCGCTGAGGAAGGCTGTAG-3' ( <i>BamHI</i> site, in-frame Myc sequence)         |
|                     | reverse   | 5'-CGCGCGGCCGCTCACATGATCAGACACTGTCACC-3' ( <i>NotI</i> site)                                                                    |
| HA-Pex19p           | forward   | 5'-CGCGGATCCCCACCATGTACCCATACGATGTTCCAGATTACGCTGCCGCCGCTGAGGAAGCTGTAG-3' ( <i>BamHI</i> site, in-frame HA sequence)             |
|                     | reverse   | 5'-CGCGCGGCCGCTCACATGATCAGACACTGTCACC-3' ( <i>NotI</i> site)                                                                    |
| Myc-Pex11 $\beta$ p | forward   | 5'-CGCGGTACCCCGCCATGGAACAAAACTCATCTCAGAAGAGGATCTGGACGCCTGGGTCCGCTTCAGTGCT-3' ( <i>Acc65I</i> site, in-frame Myc sequence)       |
|                     | reverse   | 5'-CGCGCGGCCGCTCAGGGCTTGAGTCGTAGCCAGGG-3' ( <i>NotI</i> site)                                                                   |
| ADHAPS-Myc          | forward   | 5'-CGCAAGCTTGGAAGATGGCGGAGGCGGCG                                                                                                |

|                                      |         |                                                                                                                                  |
|--------------------------------------|---------|----------------------------------------------------------------------------------------------------------------------------------|
|                                      |         | GCTGCAG-3' ( <i>Hind</i> III site)                                                                                               |
|                                      | reverse | 5'-CCGCGGCCGCTTACAGATCCTCTTCTGAGA<br>TGAGTTTTTGTTCCTAAAAGGTTTCTGTTTCCA<br>AAG-3' ( <i>Not</i> I site, in-frame Myc sequence)     |
|                                      | forward | 5'-CGCAAGCTTGGAAGATGCATCGGCTGCAG<br>GTAGTGCTGGGC-3' ( <i>Hind</i> III site)                                                      |
| Thiolase-Myc                         | reverse | 5'-CCGCGGCCGCTTACAGATCCTCTTCTGAGA<br>TGAGTTTTTGTTCGTTCCCAGGGTATTCAAAG<br>ACCGCAGC-3' ( <i>Not</i> I site, in-frame Myc sequence) |
|                                      | forward | 5'-CGCCTCGAGATGGCCGCCGCTGAGGAAGG<br>CTGTAG-3' ( <i>Xho</i> I site)                                                               |
| Pex19p-NLS-Myc                       | reverse | 5'-CGCGCGGCCGCCATGATCAGACACTGTTCA<br>CCACTGGC-3' ( <i>Not</i> I site)                                                            |
|                                      | forward | 5'-CGCAGATCTGCCACCATGCTGAGGTCTGTA<br>TGGAATT-3' ( <i>Bgl</i> II site)                                                            |
| Pex3p-EGFP                           | reverse | 5'-AAAAGTCGACTTCTCCAGTTGCTGAGGGGT<br>AC-3' ( <i>Sal</i> I site)                                                                  |
|                                      | forward | 5'-CGCAGATCTGCCACCATGGAGAAGCTGCG<br>GCTCCTGGGC-3' ( <i>Bgl</i> II site)                                                          |
| Pex16p-EGFP                          | reverse | 5'-AAAAGTCGACGTAGAATCGAGACCGAGGA<br>GAGG-3' ( <i>Sal</i> I site)                                                                 |
|                                      | forward | 5'-CGCGGTACCATGGAACAAAACTCATCTCA<br>GAA-3' ( <i>Acc</i> 65I site)                                                                |
| Citrine-Pex11 $\beta$ p              | reverse | 5'-CGCGGATCCTCAGGGCTTGAGTCGTAGCCA<br>GGG-3' ( <i>Bam</i> HI site)                                                                |
|                                      | forward | 5'-CGCGGTACCATGTACCCATACGATGTTCCA<br>GAT-3' ( <i>Acc</i> 65I site)                                                               |
| Citrine-Pex19p                       | reverse | 5'-CGCGGATCCTCACATGATCAGACACTGTTC<br>ACC-3' ( <i>Bam</i> HI site)                                                                |
| PLA/AT-3-FL and<br>PLA/AT-3-C113S-FL | forward | 5'-CGCACTAGTGGAAAATGCTAGCACCCATAC<br>CAGAAC-3' ( <i>Spe</i> I site)                                                              |

|                  |         |                                                                                                                          |
|------------------|---------|--------------------------------------------------------------------------------------------------------------------------|
|                  | reverse | 5'-CGCGCGGCCGCTCACTTATCGTCGTCATCC<br>TTGTAATCTTGCTTCTGTTTCTTGTTTC-3' ( <i>NotI</i><br>site, in-frame FLAG sequence)      |
|                  | forward | 5'-CGCACTAGTGGAAAATGGGAGACCTGATT<br>GAGATTTTCC-3' ( <i>SpeI</i> site)                                                    |
| PLA/AT-3-ΔN10-FL | reverse | 5'-CGCGCGGCCGCTCACTTATCGTCGTCATCC<br>TTGTAATCTTGCTTCTGTTTCTTGTTTC-3' ( <i>NotI</i><br>site, in-frame FLAG sequence)      |
|                  | forward | 5'-CGCACTAGTGGAAAATGCTAGCACCCATAC<br>CAGAAC-3' ( <i>SpeI</i> site)                                                       |
| PLA/AT-3-ΔC27-FL | reverse | 5'-CGCGCGGCCGCTCACTTATCGTCGTCATCC<br>TTGTAATCCTTGACCGCATCTCTGACCTGATC-<br>3' ( <i>NotI</i> site, in-frame FLAG sequence) |
|                  | forward | 5'-CGCACTAGTCCAAGATGGCTTTGGCCAGAC<br>CAAG-3' ( <i>SpeI</i> site)                                                         |
| PLA/AT-2-FL      | reverse | 5'-CGCGCGGCCGCCTACTTATCGTCGTCATCC<br>TTGTAATCTTGCCTTTCCCGCTTGCTTCTGG-3'<br>( <i>NotI</i> site, in-frame FLAG sequence)   |

Supplemental Table 2. Primers used for RT-PCR.

| Name     | Direction | Sequence                             |
|----------|-----------|--------------------------------------|
| PLA/AT-1 | forward   | 5'-CTGCCCAGGGGACTTGATCGAAGTG-3'      |
|          | reverse   | 5'-ACTTGGCGCTTGTAAGGACGCAGG-3'       |
| PLA/AT-2 | forward   | 5'-GGCTATGCACACTGGGCCATCTACG-3'      |
|          | reverse   | 5'-GTTGGTCAGGGCAGACAGGACACTG-3'      |
| PLA/AT-3 | forward   | 5'-GCTGACCAGCGAGAAGTGTGAGCAC-3'      |
|          | reverse   | 5'-CTCCAGCGATGCCTACCGCCTTGAC-3'      |
| PMP70    | forward   | 5'-GTCATTGTCGAAAGGTTGGCATCAC-3'      |
|          | reverse   | 5'-AGTTGCCTCTGCCATCCATATGCAG-3'      |
| catalase | forward   | 5'-AAGGTTTGGCCTCACAAGGACTACCCTC-3'   |
|          | reverse   | 5'-TAGGCAAAAAGGCGGCCCTGAAGCATTTTG-3' |
| Pex3p    | forward   | 5'-TCAAGTATTCAGCACCTACTTGGAG-3'      |
|          | reverse   | 5'-TAATCCAAGAAGAAGACTTATGCTGC-3'     |
| Pex11βp  | forward   | 5'-CCTCAATCGAGCCTTGTACTTCGCC-3'      |
|          | reverse   | 5'-GCGAATCTCATAAGCATCACGGCTC-3'      |
| Pex16p   | forward   | 5'-GTGGTGCGAACCTCCAGAACA-3'          |
|          | reverse   | 5'-CCCAGGCTGAGCAAGTGCAGC-3'          |
| Pex19p   | forward   | 5'-GATCACAGAAAAGTATCCAGAATGG-3'      |
|          | reverse   | 5'-AAGTTGAGGCCAGGAGGCATCTC-3'        |
| GAPDH    | forward   | 5'-CGCTGAGTACGTCGTGGAGTCCACT-3'      |
|          | reverse   | 5'-AGCAGAGGGGGCAGAGATGATGACC-3'      |

Supplemental Figure. **Determination of molecular species of ether-type ethanolamine phospholipids by product ion scanning.**

A, the product ion spectra of the  $[M-H]^-$  ions of the major ether-type ethanolamine phospholipids from HEK293 cells are shown. B, molecular species determined by product ion scanning (A) are summarized. The prefix “e” indicates an ether-type phospholipid and the postfix “p” indicates a chain with a vinyl ether linkage.

**A**

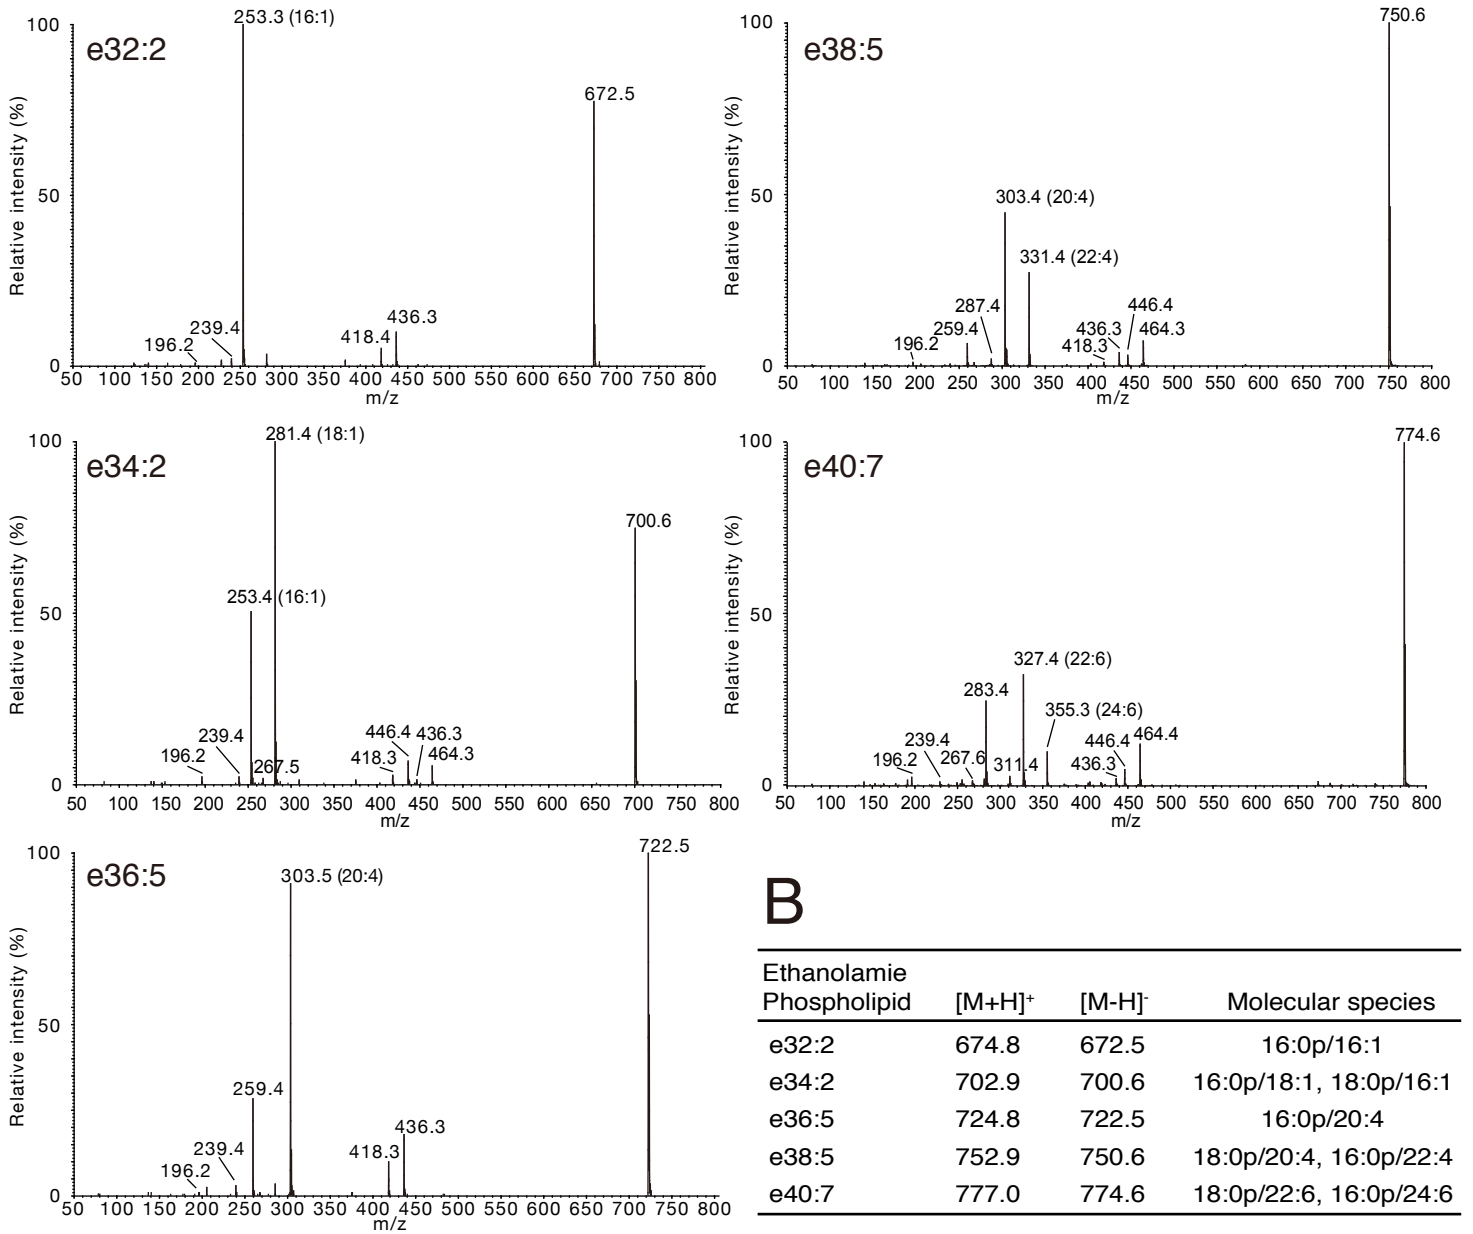

**B**

| Ethanolamie Phospholipid | [M+H] <sup>+</sup> | [M-H] <sup>-</sup> | Molecular species      |
|--------------------------|--------------------|--------------------|------------------------|
| e32:2                    | 674.8              | 672.5              | 16:0p/16:1             |
| e34:2                    | 702.9              | 700.6              | 16:0p/18:1, 18:0p/16:1 |
| e36:5                    | 724.8              | 722.5              | 16:0p/20:4             |
| e38:5                    | 752.9              | 750.6              | 18:0p/20:4, 16:0p/22:4 |
| e40:7                    | 777.0              | 774.6              | 18:0p/22:6, 16:0p/24:6 |
